# Supplementary material
Source: publisher site journal article supplement (https://www.degruyterbrill.com/publication/isbn/9783486598964/downloadAsset/9783486598964_Leseprobe.pdf)
Supplement: Supplementary file 1 [file 9783486598964_Leseprobe.pdf]

## 3 Gebundene Zustände in einem Zentralpotential

Eigenvektoren des Hamilton-Operators eines (geschlossenen) Mikrosystems erfahren durch die Schrödinger-Gleichung eine Zeitentwicklung in der Gestalt eines multiplikativen Phasenfaktors. Dieser Phasenfaktor hat die Form  $\exp\{\frac{-iEt}{\hbar}\}$  mit dem zum Eigenvektor gehörigen Eigenwert  $E$ . Offensichtlich resultieren aus einer derartigen Wahrscheinlichkeitsamplitude zeitunabhängige Erwartungswerte von Observablen und insbesondere eine zeitunabhängige räumliche Lokalisierung des Systems. Aus Gründen physikalischer Stabilität muß ein Hamilton-Operator, sofern er überhaupt Eigenwerte aufweist, einen endlichen tiefsten Eigenwert haben: Der Eigenvektor zu diesem Eigenwert bildet den Grundzustand des Systems. Hierbei haben wir angenommen, daß der tiefste Eigenwert nicht entartet ist.

### 3.1 Vertauschbare Operatoren und simultane Eigenvektoren

Ein gegebener Eigenwert eines selbstadjungierten Operators ist im allgemeinen Fall entartet – dann ist zwar der zugehörige Eigenraum eindeutig bestimmt, jedoch dort keine Basis ausgezeichnet. Es stellt sich daher die Frage, ob eine ausgezeichnete Basis erzeugt werden kann, wenn weitere Operatoren hinzugenommen werden. Im Fall eines endlich-dimensionalen Eigenraums gilt der

#### **Satz**

*In einem Hilbert-Raum  $\mathcal{H}$  besitze der selbstadjungierte Operator  $H$  einen Eigenwert  $\lambda$  mit endlich-dimensionalem Eigenraum  $\mathcal{H}_\lambda \subset \mathcal{H}$ . Vertauschen die selbstadjungierten Operatoren  $H, A, B, \dots$  paarweise miteinander, so kann in  $\mathcal{H}_\lambda$  eine Basis aus simultanen Eigenvektoren dieser Operatoren gewählt werden.*

Anmerkung: Sind unter den Operatoren unbeschränkte – der Normalfall in der Quantenmechanik –, so müssen Definitionsbereiche präzisiert werden, worüber hier hinweggegangen wird. Wir können dann den Satz auf das Analogon in der Linearen Algebra zurückführen.

**Beweis:** Die vorausgesetzte endliche Dimension des Eigenraums  $\mathcal{H}_\lambda$  sei  $n$ . In diesem Eigenraum des Operators  $H$  sind die Vektoren einer Orthonormalbasis  $\{f_i\}_{i=1,\dots,n}$  per definitionem Eigenvektoren zum Eigenwert  $\lambda$ :

$$Hf_i = \lambda f_i, \quad i = 1, 2, \dots, n. \quad (3.1.1)$$

Eine solche Orthonormalbasis ist durch den Operator  $H$  nur bis auf eine unitäre Transformation bestimmt: Sei  $u$  eine beliebige unitäre  $n \times n$  Matrix, also  $u^* = u^{-1}$ , so bilden die Vektoren

$$\phi_i := \sum_{j=1}^n \overline{u_{ij}} f_j, \quad i = 1, 2, \dots, n \quad (3.1.2)$$

ebenfalls eine Orthonormalbasis im Eigenraum  $\mathcal{H}_\lambda$ ; mithin gilt

$$H\phi_i = \lambda\phi_i, \quad (\phi_i, \phi_j) = \delta_{ij} \quad (3.1.3)$$

für  $i, j \in \{1, \dots, n\}$ . Da die Operatoren  $A, B, C, \dots$  mit  $H$  vertauschen, bilden sie den Eigenraum  $\mathcal{H}_\lambda$  jeweils in sich ab:

$$HAf_i = AHf_i = \lambda Af_i, \quad i = 1, \dots, n,$$

und in gleicher Weise die Operatoren  $B, C, \dots$ . Somit lassen sich die jeweiligen Bildvektoren wiederum nach der (ursprünglichen) Basis entwickeln:

$$Af_j = \sum_{l=1}^n a_{lj} f_l, \quad Bf_j = \sum_{l=1}^n b_{lj} f_l, \quad \dots, \quad j = 1, \dots, n. \quad (3.1.4)$$

Außerdem sind die Operatoren  $A, B, C, \dots$  selbstadjungiert, weshalb

$$a_{ij} = (f_i, Af_j) = (Af_i, f_j) = \overline{a_{ji}} \quad (3.1.5)$$

folgt, sowie analoge Relationen der anderen Operatoren. Die Entwicklungskoeffizienten  $a_{ij}$ , mit  $i, j \in \{1, \dots, n\}$  sind demnach die Elemente einer selbstadjungierten  $n \times n$  Matrix  $a = a^*$ ; entsprechend  $b = b^*, \dots$ . Die Komposition zweier Abbildungen  $A$  und  $B$  aus (3.1.4) ergibt

$$(f_i, ABf_j) = (ab)_{ij}, \quad (f_i, B Af_j) = (ba)_{ij}.$$

Verwenden wir schließlich noch, daß die Operatoren  $A, B, C, \dots$  paarweise vertauschen, so überträgt sich diese Eigenschaft offensichtlich auf die Matrizes  $a, b, c, \dots$ :

$$[a, b] = 0, \quad [a, c] = 0, \quad [b, c] = 0, \quad \dots \quad (3.1.6)$$

Ein zentraler Satz der Linearen Algebra, siehe z.B. [Ga], besagt nun: Gegeben seien die selbstadjungierten paarweise vertauschbaren  $n \times n$  Matrizen  $a, b, c, \dots$ , dann existiert eine unitäre  $n \times n$  Matrix  $u$ , welche diese Matrizen simultan diagonalisiert, also

$$(uau^*)_{ki} = \alpha_i \delta_{ki}, \quad (ubu^*)_{ki} = \beta_i \delta_{ki}, \quad \dots \quad (3.1.7)$$

In der transformierten Orthonormalbasis (3.1.2) wählen wir diese derart ausgezeichnete unitäre Matrix und bestimmen die Abbildungen der neuen Basisvektoren durch die Operatoren  $A, B, C, \dots$ , indem wir nacheinander (3.1.4), die Umkehrung von (3.1.2), und (3.1.7) benützen:

$$A\phi_i = \sum_l (au^*)_{li} f_l = \sum_k (uau^*)_{ki} \phi_k = \alpha_i \phi_i, \quad (3.1.8)$$

und mit den Operatoren  $B, C, \dots$  entsprechend.  $\square$

Die mathematische Aussage des Satzes ist (zunächst) unabhängig von einer physikalischen Interpretation der Operatoren  $H, A, B, C, \dots$ . Sie hat gewichtige Auswirkungen im Fall eines Hamilton-Operators, der (auch) Eigenwerte aufweist, die im allgemeinen entartet sind, jedoch mit einem endlichen Entartungsgrad:

- i) Gibt es weitere Observablen des betrachteten Systems, deren Operatoren zusammen mit dem Hamilton-Operator paarweise vertauschen, so erzeugen die simultanen Eigenvektoren – falls hinreichend viele solcher Operatoren gegeben sind – eine physikalisch ausgezeichnete Zerlegung eines Eigenraumes des Hamilton-Operators in eindimensionale Teilräume.
- ii) Wird eine Gesamtheit durch eine Wahrscheinlichkeitsamplitude beschrieben, die simultaner Eigenvektor einer Menge paarweise miteinander vertauschender Operatoren ist, so verschwinden die mittleren Schwankungsquadrate der diesen Operatoren entsprechenden Observablen. Mit anderen Worten: Die Meßstatistik jeder dieser Observablen ist scharf im jeweiligen Eigenwert konzentriert.

## 3.2 Das diskrete Spektrum des Hamilton-Operators

Einem System, das aus zwei unterscheidbaren Teilchen besteht, ordnet die Quantenmechanik den Hilbert-Raum  $\mathcal{L}^2(\mathbb{R}^6)$  zu und – falls diese beiden Teilchen durch ein Relativpotential aufeinander wirken, das nur vom Abstand abhängt – einen Hamilton-Operator der Form

$$\tilde{H} = -\frac{\hbar^2}{2m_1} \Delta_{(1)} - \frac{\hbar^2}{2m_1} \Delta_{(1)} + v(|\vec{x}^{(1)} - \vec{x}^{(2)}|). \quad (3.2.1)$$

Die Potentialfunktion  $v$  soll später genauer charakterisiert werden. Analog zur klassischen Theorie führt man dann *Schwerpunkts- und Relativkoordinaten*

$$\vec{y} = \frac{m_1 \vec{x}^{(1)} + m_2 \vec{x}^{(2)}}{m_1 + m_2}, \quad \vec{x} = \vec{x}^{(1)} - \vec{x}^{(2)} \quad (3.2.2)$$

ein, wie auch die *reduzierte Masse*

$$m_0 = \frac{m_1 m_2}{m_1 + m_2}. \quad (3.2.3)$$

Der Hamilton-Operator (3.2.1) nimmt als Folge dieser Koordinatentransformation im Hilbert-Raum  $\mathcal{L}^2(\mathbb{R}^6)$  die Gestalt

$$\begin{aligned} \tilde{H} &= H_s + H_r, \\ H_s &= -\frac{\hbar^2}{2(m_1 + m_2)} \Delta_{(\vec{y})}, \quad H_r = -\frac{\hbar^2}{2m_0} \Delta_{(\vec{x})} + v(|\vec{x}|) \end{aligned} \quad (3.2.4)$$

an: Er ist nun die Summe zweier Operatoren, wobei der eine,  $H_s$ , sich nur auf die Schwerpunktskoordinaten  $\vec{y}$  bezieht, der andere indessen,  $H_r$ , nur auf die Relativkoordinaten  $\vec{x}$ . Wenn wir die Vektoren aus  $\mathcal{L}^2(\mathbb{R}^6)$  als Summe von Produkten der Form

$$f(\vec{x})g(\vec{y}), \quad \text{mit } f, g \in \mathcal{L}^2(\mathbb{R}^3),$$

darstellen, zerfällt das anfängliche Zweiteilchensystem in zwei unabhängige Einteilchensysteme:

- i) Der Hamilton-Operator  $H_s$  ist der Operator der kinetischen Energie eines Teilchens der Masse  $m_1 + m_2$ . Somit bewegt sich der Schwerpunkt des ursprünglichen Zweiteilchensystems wie ein freies Teilchen dieser Masse – ganz analog der klassischen Theorie. Wie wir schon bei der im einleitenden Kapitel vorgenommenen ersten Orientierung im Terrain der Quantenmechanik bemerkt haben, gibt es keine Eigenvektoren des Operators  $H_s$ . Der von ihm bewirkten Zeitentwicklung werden wir uns im Kapitel 6 zuwenden.
- ii) Die Wechselwirkung der beiden Teilchen kommt im Summanden  $H_r$  in der Gleichung (3.2.4) zum Vorschein. Dieser Operator  $H_r$  hat die Form des Hamilton-Operators eines Teilchens der Masse  $m_0$  unter dem Einfluß des Zentralpotentials  $v$ .

Wir richten daher im folgenden unser Augenmerk auf den Hilbert-Raum  $\mathcal{H} = \mathcal{L}^2(\mathbb{R}^3)$  und einen Hamilton-Operator  $H$  der Gestalt

$$H = -\frac{\hbar^2}{2m_0}\Delta + v(|\vec{x}|) . \quad (3.2.5)$$

Hierin sei die Potentialfunktion  $v(r)$ ,  $r = |\vec{x}|$ , stückweise stetig und habe einen endlichen Grenzwert

$$\lim_{r \rightarrow 0} rv(r) = \kappa \quad (3.2.6)$$

der (gegebenenfalls) den Wert Null annehmen kann. Außerdem soll  $rv(r)$  nach unten beschränkt sein. (Wir übergehen die Frage nach einem Definitionsbereich, auf dem  $H$  wesentlich selbstadjungiert ist.) Einige physikalisch interessante Beispiele seien aufgeführt, die reellen Parameter haben eine physikalische Dimension:

$$\begin{aligned} \text{Yukawa-Potential:} & \quad v(r) = a \frac{e^{-\mu r}}{r}, \mu > 0, \\ \text{Exponentialpotential:} & \quad v(r) = ae^{-\mu r}, \mu > 0, \\ \text{Topfpotential:} & \quad v(r) = a\Theta(r_0 - r), r_0 > 0, \\ \text{Coulomb-Potential:} & \quad v(r) = \frac{a}{r}, \\ \text{Isotroper Oszillator:} & \quad v(r) = ar^2, a > 0. \end{aligned}$$

Der Hamilton-Operator (3.2.5) und der Operator des Bahndrehimpulses  $\vec{L}$ , (2.2.2), vertauschen miteinander:

$$[H, L_a] = 0, \quad a = 1, 2, 3.$$

Wir suchen die simultanen Eigenvektoren der paarweise vertauschbaren Operatoren

$$H, \vec{L}^2, L_3, \mathcal{P}. \quad (3.2.7)$$

Die Rotationssymmetrie des Hamilton-Operators legt nahe, sphärische Polarkoordinaten einzuführen. In den cartesischen Koordinaten gilt auf differenzierbaren Funktionen:

$$r^2 \Delta = (\vec{x} \cdot \vec{\nabla})(\vec{x} \cdot \vec{\nabla}) + \vec{x} \cdot \vec{\nabla} - \vec{L}^2. \quad (3.2.8)$$

Die Herleitung ist eine Übung im Differenzieren:

$$\begin{aligned} \vec{L}^2 f(\vec{x}) &= (-i)^2 \sum_{j,k,l,\alpha,\beta} \varepsilon_{jkl} \varepsilon_{j\alpha\beta} x_k \partial_l x_\alpha \partial_\beta f(\vec{x}) \\ &= - \sum_{k,l,\alpha,\beta} \{\delta_{k\alpha} \delta_{l\beta} - \delta_{k\beta} \delta_{l\alpha}\} x_k \partial_l x_\alpha \partial_\beta f(\vec{x}) \end{aligned}$$

$$\begin{aligned}
&= \sum_{k,l} \{-x_k \partial_l x_k \partial_l + x_k \partial_l x_l \partial_k\} f(\vec{x}) \\
&= \{-\vec{x} \cdot \vec{\nabla} - r^2 \Delta + 3\vec{x} \cdot \vec{\nabla} + \underbrace{\sum_k x_k \vec{x} \cdot \vec{\nabla} \partial_k}_{\vec{x} \cdot \vec{\nabla} \vec{x} \cdot \vec{\nabla} - \vec{x} \cdot \vec{\nabla}}\} f(\vec{x}) .
\end{aligned}$$

Zur Formulierung in sphärischen Polarkoordinaten,  $F(r, \vartheta, \varphi) = f(\vec{x}(r, \vartheta, \varphi))$ , gelangt man leicht mittels der Relation

$$\begin{aligned}
r \frac{\partial F}{\partial r} &= r \{ (\partial_1 f) \sin \vartheta \cos \varphi + (\partial_2 f) \sin \vartheta \sin \varphi + (\partial_3 f) \cos \vartheta \} \\
&= x_1 \partial_1 f + x_2 \partial_2 f + x_3 \partial_3 f \\
&= \vec{x} \cdot \vec{\nabla} f .
\end{aligned}$$

Hiermit in die Identität (3.2.8) eingegangen, führt schließlich zu

$$\Delta f = \frac{1}{r} \left( \frac{\partial}{\partial r} \right)^2 r F - \frac{1}{r^2} \vec{L}^2 F, \quad (3.2.9)$$

und der Hamilton-Operator gewinnt die Form

$$H = -\frac{\hbar^2}{2m_0} \left\{ \frac{1}{r} \left( \frac{\partial}{\partial r} \right)^2 r - \frac{\vec{L}^2}{r^2} \right\} + v(r). \quad (3.2.10)$$

Mit den Kugelfunktionen  $Y_l^m$  aus dem Abschnitt 2.2.2 setzen wir die simultanen Eigenvektoren (oder auch Eigendistributionen) der Operatoren (3.2.7) an in der Form

$$\phi(\vec{x}) = \frac{u(r)}{r} Y_l^m(\vartheta, \varphi). \quad (3.2.11)$$

Dieser Ansatz erfüllt bereits die Eigenwertgleichungen

$$\vec{L}^2 \phi = l(l+1) \phi, \quad L_3 \phi = m \phi, \quad \mathcal{P} \phi = (-1)^l \phi. \quad (3.2.12)$$

Aus der Forderung

$$H \phi \stackrel{!}{=} E \phi$$

wird mit (3.2.11) die Eigenwertgleichung

$$\left\{ -\frac{\hbar^2}{2m_0} \left( \frac{d}{dr} \right)^2 + \frac{\hbar^2}{2m_0} \frac{l(l+1)}{r^2} + v(r) \right\} u(r) = E u(r). \quad (3.2.13)$$

Offensichtlich gibt es eine gewisse Ähnlichkeit mit dem Hamilton-Operator in einem eindimensionalen Raum, jedoch mit zwei Modifikationen:

- i) Das in der Gleichung (3.2.13) wirksame Potential

$$w(r; l) := \frac{\hbar^2}{2m_0} \frac{l(l+1)}{r^2} + v(r) \quad (3.2.14)$$

ist die Summe aus einer abstoßenden „Drehimpulsbarriere“ und dem Zentralpotential  $v(r)$ .

- ii) Die Variable  $r$  ist die Koordinate der Halbachse  $[0, \infty)$ ; der Übergang zu sphärischen Polarkoordinaten impliziert eine Randbedingung bei  $r = 0$ :

$$\lim_{r \rightarrow 0} r^{-l-1} u(r) \stackrel{!}{=} \text{const} \neq 0. \quad (3.2.15)$$

Diese Randbedingung werden wir anschließend begründen. Eigenvektoren  $u(r)$ , also solche Lösungen der Gleichung (3.2.13), daß

$$\|\phi\|^2 = \int_0^\infty dr |u(r)|^2 < \infty$$

gilt, werden wir nur im Falle eines anziehenden Potentials  $v(r)$  erwarten.

Da das wirksame Potential (3.2.14) von der Drehimpulsquantenzahl  $l$  abhängt, liegt die Vermutung nahe, daß im allgemeinen Fall Eigenwerte  $E$  mit verschiedenen Drehimpulsquantenzahlen  $l$  nicht zusammenfallen: Jeder Eigenwert  $E$  des Hamilton-Operators weist dann nur die notwendige  $(2l+1)$ -fache Entartung in der Quantenzahl  $m$  auf, da die Eigenwertgleichung (3.2.13) selbst nicht von  $m$  abhängt – dies wird als die *natürliche Entartung* bezeichnet.

Wir müssen noch die Randbedingung (3.2.15) begründen. In dieser Absicht führen wir zunächst die Abkürzungen

$$\tilde{v}(r) := \frac{2m_0}{\hbar^2} v(r), \quad \lambda := \frac{2m_0 E}{\hbar^2}$$

ein, wodurch die Eigenwertgleichung (3.2.13) die etwas schlankere Gestalt

$$\left\{ - \left( \frac{d}{dr} \right)^2 + \frac{l(l+1)}{r^2} + \tilde{v}(r) - \lambda \right\} u(r) = 0 \quad (3.2.16)$$

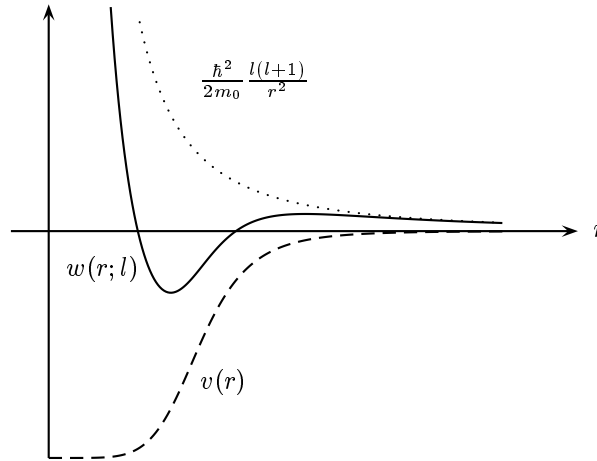

**Abbildung 3.1:** Das einem anziehenden Potential  $v(r)$  entsprechende wirksame Potential  $w(r; l)$ , Gleichung (3.2.14)

annimmt. Im Einklang mit der Annahme (3.2.6) schreiben wir die Potentialfunktion  $\tilde{v}(r)$  in einer Umgebung des Ursprungs  $r = 0$  in der Form

$$\tilde{v}(r) = \frac{v_{-1}}{r} + v_0 + v_1 r + \mathcal{O}(r^2) . \quad (3.2.17)$$

Die Gleichung (3.2.16) ist eine gewöhnliche Differentialgleichung zweiter Ordnung: Sie besitzt daher ein Fundamentalsystem, das aus zwei linear unabhängigen Lösungen besteht. Wir behaupten: In einer Umgebung des Ursprungs  $r = 0$  bilden die formalen Potenzreihen

$$\begin{aligned} u_1(r) &= r^{l+1} \{1 + a_1 r + a_2 r^2 + \dots\} , \\ u_2(r) &= r^{-l} \{1 + b_1 r + b_2 r^2 + \dots\} + c u_1(r) \ln r , \text{ wobei } b_{2l+1} = 0 , \end{aligned} \quad (3.2.18)$$

mit den Koeffizienten

$$\begin{aligned} a_1 &= \frac{v_{-1}}{2(l+1)} , \quad a_2 = \frac{v_0 + a_1 v_{-1} - \lambda}{2(2l+3)} , \dots , \\ b_1 &= 0 , \quad b_2 = \frac{1}{2}(v_0 - \lambda - 3a_1 v_{-1}) , \dots , \quad c = v_{-1} , \text{ falls } l = 0 , \\ b_1 &= -\frac{v_{-1}}{2l} , \quad b_2 = \frac{\lambda - v_0 - b_1 v_{-1}}{4l-2} , \dots , \text{ falls } l \geq 1 , \end{aligned} \quad (3.2.19)$$

ein Fundamentalsystem der Differentialgleichung (3.2.16). Diese Behauptung verifiziert man unschwer durch Koeffizientenvergleich im Sinne formaler Potenzreihen. Das angenommene Verhalten (3.2.17) der Potentialfunktion in einer Umgebung des Ursprungs garantiert, daß dort die Drehimpulsbarriere die dominierende Singularität



darstellt und folglich die jeweils leitende Potenz der beiden Lösungen bestimmt. Blicken wir auf die beiden Lösungen (3.2.18) der Radialgleichung im Rahmen der Quantenmechanik, so müssen wir die Lösung  $u_2(r)$  für  $l \geq 1$  verwerfen, da sie im Ursprung nicht lokal quadratintegrabel ist. Für  $l = 0$  indessen ist die Lösung  $u_2(r)$  zwar quadratintegrabel, jedoch ist

$$\phi(\vec{x}) = \frac{u_2(r)}{r} Y_0^0 = \frac{\text{const}}{r} + \text{weniger singuläre Terme}$$

keine Lösung der ursprünglichen Eigenwertgleichung  $H\phi = E\phi$ , da

$$\Delta \frac{1}{r} = -4\pi\delta(\vec{x})$$

gilt. (In der Elektrostatik ist dies die Poisson-Gleichung für das Potential einer Punktladung, die im Koordinatenursprung sitzt.) Verursacht wird diese Diskrepanz durch den Wechsel von cartesischen Koordinaten zu sphärischen Polarkoordinaten, der im Ursprung singulär ist. Somit muß für alle  $l \in \mathbb{N}_0$  die Lösung  $u_2(r)$  ausgeschlossen werden: Dies bewerkstelligt gerade die Randbedingung (3.2.15), die mit dem leitenden Verhalten der Lösung  $u_1(r)$  übereinstimmt.

Die simultanen Eigenvektoren der Operatoren (3.2.7) ergeben sich also in der Form des Produkts (3.2.11), in welchem die Radialfunktion  $u(r)$  eine quadratintegrale Lösung der Eigenwertgleichung (3.2.13) ist, die der Randbedingung (3.2.15) genügt. Wir werden anschließend den Fall des isotropen Oszillatorpotentials und des Coulomb-Potentials im einzelnen behandeln. In beiden Fällen ist die Anzahl der Eigenwerte abzählbar-unendlich; im ersteren haben wir dies bereits gesehen, im letzteren sei es hier schon vorweggenommen. Ist das Potential kurzreichweitig, so kann es höchstens endlich viele gebundene Zustände geben. Diese Aussage ist eine Konsequenz der *Bargmannschen Schranke* für die Anzahl  $n_l(v)$  der quadratintegralen regulären (d.h. der Randbedingung (3.2.15) genügenden) Lösungen der Eigenwertgleichung (3.2.13):

$$n_l(v) \leq \frac{1}{2l+1} \frac{2m_0}{\hbar^2} \int_0^\infty dr r |v_-(r)|, \quad (3.2.20)$$

hierbei ist  $v_-(r) := \min(v(r), 0)$  die Einschränkung der Potentialfunktion auf ihren negativen Wertebereich. Zum Beweis sei neben [Ba] noch auf [RS, vol. IV] verwiesen. Offensichtlich liefert ein anziehendes Potential  $v(r)$ , dessen Betrag für großes  $r$  nicht schwächer abfällt als  $r^{-a}$ , wobei  $a > 2$ , eine endliche Schranke. (Das Yukawa-, das Exponential- und das Topfpotential können wiederum als Beispiele dienen.) Außerdem sind dann nur endlich viele der nichtnegativen ganzen Zahlen  $n_l(v)$  von Null verschieden. Ein Eigenwert des Hamilton-Operators mit der Drehimpulsquantenzahl  $l$  ist  $(2l+1)$ -fach entartet, folglich ist  $(2l+1)n_l(v)$  die Anzahl der gebundenen Zustände

mit der Drehimpulsquantenzahl  $l$ . Im Abschnitt 6.7.2 werden wir die gebundenen Zustände des Exponentialpotentials im Fall  $l = 0$  noch analytisch bestimmen.

### 3.3 Der isotrope Oszillator nochmals

Im Fall des dreidimensionalen isotropen harmonischen Oszillators konnten wir schon zuvor die Eigenvektoren seines Hamilton-Operators vollständig bestimmen, ohne dabei simultane Eigenvektoren mit den Operatoren  $\vec{L}^2$  und  $L_3$  in Betracht zu ziehen. Dieses Gelingen ist in der sehr speziellen Gestalt des Hamilton-Operators begründet. Der entscheidende Schritt zur Konstruktion der Eigenvektoren bestand in der Ersetzung der fundamentalen Observablen  $q_j$  und  $p_j, j = 1, 2, 3$ , durch die Operatoren  $a_j$  und die dazu adjungierten Operatoren  $a_j^*$ , vgl. die Definitionen (1.4.15). Aus den Vertauschungsrelationen der fundamentalen Observablen folgen dann die Vertauschungsrelationen

$$[a_j, a_k] = 0, \quad [a_j^*, a_k^*] = 0, \quad [a_j, a_k^*] = \delta_{jk} \mathbb{1}. \quad (3.3.1)$$

Der Hamilton-Operator nimmt die Gestalt

$$H = \hbar\omega \left\{ \sum_{j=1}^3 a_j^* a_j + \frac{3}{2} \mathbb{1} \right\} \quad (3.3.2)$$

an und sein normierter Grundzustand  $\phi_{0,0,0}$  wird durch die Operatoren  $a_j$  „vernichtet“:

$$a_j \phi_{0,0,0} = 0, \quad \text{für } j = 1, 2, 3. \quad (3.3.3)$$

Die orthonormierten Vektoren, wobei  $(n_1, n_2, n_3) \in \mathbb{N}_0^3$ ,

$$\phi_{n_1, n_2, n_3} = (n_1! n_2! n_3!)^{-\frac{1}{2}} (a_1^*)^{n_1} (a_2^*)^{n_2} (a_3^*)^{n_3} \phi_{0,0,0} \quad (3.3.4)$$

sind Eigenvektoren des Hamilton-Operators zum Eigenwert  $\hbar\omega(n_1 + n_2 + n_3 + \frac{3}{2})$ , ihre Gesamtheit bildet eine Orthonormalbasis im Hilbert-Raum  $\mathcal{H}$ . Außer dem tiefsten Eigenwert ( $n_1 = n_2 = n_3 = 0$ ) sind alle anderen entartet: Zu gegebener Hauptquantenzahl  $n \in \mathbb{N}_0$  gibt es  $\frac{1}{2}(n+2)(n+1)$  Tripel  $(n_1, n_2, n_3)$ , die  $n_1 + n_2 + n_3 = n$  erfüllen. Da der Hamilton-Operator  $H$  mit dem Operator des Bahndrehimpulses vertauscht, bildet jede Komponente  $L_j$  einen Eigenraum von  $H$  in sich ab. Dies wird direkt an den Eigenvektoren ersichtlich, wenn man die Operatoren

$$L_j = \frac{1}{i} \sum_{r,s=1}^3 \varepsilon_{jrs} a_r^* a_s, \quad j = 1, 2, 3, \quad (3.3.5)$$

darauf anwendet: Hierdurch ergibt sich aus einem Eigenvektor (3.3.4) im allgemeinen eine Linearkombination solcher Vektoren mit unverändertem Wert für  $n$ . Wie wir bei der Behandlung des Bahndrehimpulses im Abschnitt 2.2.1 gesehen haben, ist der Eigenraum mit der Hauptquantenzahl  $n$  die direkte Summe aus Eigenräumen des Operators  $\vec{L}^2$  mit den Quantenzahlen  $l = n, n-2, \dots, 1$  bzw. 0; weist somit nicht die „natürliche Entartung“ auf! Was ist unnatürlich am isotropen harmonischen Oszillator? Er besitzt eine zusätzliche *dynamische Symmetrie*, welche die Rotationssymmetrie umfaßt: Mit den Elementen einer (beliebigen) komplexen unitären  $3 \times 3$  Matrix  $u$ , also  $u \in U(3)$ , definiert man die Linearkombinationen

$$b_j := \sum_{l=1}^3 u_{jl} a_l, \quad \Rightarrow \quad b_j^* = \sum_{l=1}^3 \overline{u_{jl}} a_l^*. \quad (3.3.6)$$

Aus den Vertauschungsrelationen (3.3.1) folgt dann

$$[b_j, b_l] = 0, \quad [b_j^*, b_l^*] = 0, \quad [b_j, b_l^*] = \delta_{jl} \mathbb{1}, \quad (3.3.7)$$

und der Hamilton-Operator (3.3.2) wird zu

$$H = \hbar\omega \left( \sum_{j=1}^3 b_j^* b_j + \frac{3}{2} \right). \quad (3.3.8)$$

Schränkt man die Wahl der Matrix  $u$  auf die reelle Untergruppe  $SO(3) \subset U(3)$  ein, so sind die Operatoren  $\{b_j\}$  gerade die Entsprechungen der Operatoren  $\{a_j\}$  in einem gedrehten Koordinatensystem. Dies folgt aus dem Sachverhalt, daß eine Drehmatrix  $u$  reell ist: Dann werden in (3.3.6) die Operatoren  $\{a_j\}$  und  $\{a_j^*\}$  in gleicher Weise transformiert und hierdurch wiederum die fundamentalen Observablen  $\{q_j\}$  und  $\{p_j\}$ . Die fundamentalen Observablen in einem gedrehten Koordinatensystem ergeben sich aus denjenigen des ursprünglichen Koordinatensystems durch die linearen Relationen

$$q'_j = \sum_{l=1}^3 u_{jl} q_l, \quad p'_j = \sum_{l=1}^3 u_{jl} p_l,$$

mit der (reellen) Drehmatrix  $u \in SO(3)$ .

Aus der Forminvarianz (3.3.8) des Hamilton-Operators folgt, daß dessen Eigenräume jeweils auch aufgespannt werden, wenn in den Vektoren (3.3.4) die Operatoren  $a_j^*$  durch die Operatoren  $b_j^*$  für  $j = 1, 2, 3$  ersetzt werden; bei beliebig gewähltem  $u \in U(3)$  in der Definition (3.3.6). Dies bedeutet, daß in den Eigenräumen des Hamilton-Operators  $H$  jeweils eine *unitäre Darstellung* der Gruppe  $U(3)$  realisiert ist. Anstelle dieser Sichtweise können wir infinitesimale  $U(3)$ -Transformationen betrachten: Diese werden im Hilbert-Raum erzeugt durch den Hamilton-Operator  $H$  und die Operatoren

$$\begin{aligned} E_1 &:= a_2^* a_3, & E_1^* &, & E_2 &:= a_3^* a_1, & E_2^* &, & E_3 &:= a_1^* a_2, & E_3^* &, \\ H_1 &:= a_1^* a_1 - a_2^* a_2, & H_2 &:= a_2^* a_2 - a_3^* a_3, \end{aligned} \quad (3.3.9)$$

deren jeder mit  $H$  vertauscht. Außerdem ist der Kommutator zweier Operatoren aus (3.3.9) stets eine reelle Linearkombination dieser Operatoren. Ist also  $\psi$  ein Eigenvektor des Hamilton-Operators  $H$  mit dem Eigenwert  $\lambda$ , so gilt dies auch für  $E_1\psi, E_2\psi$  etc. Die Drehimpulsoperatoren sind lediglich eine Untermenge der Operatoren (3.3.9):

$$L_\alpha = \frac{1}{i}(E_\alpha - E_\alpha^*), \quad \alpha = 1, 2, 3. \quad (3.3.10)$$

(Ohne weitere Erläuterung sei für Leser mit einiger Kenntnis der Darstellungstheorie erwähnt, daß die Eigenräume von  $H$  diejenigen irreduziblen Darstellungsräume der Gruppe  $U(3)$  sind, welche durch die *Young-Rahmen*  $\square, \square\square, \square\square\square, \dots$  charakterisiert werden.)

## 3.4 Ein Teilchen im Coulomb-Potential

Am Beispiel des anziehenden Coulomb-Potentials soll das im Abschnitt 3.2 reduzierte Eigenwertproblem des Hamilton-Operators explizit gelöst werden. Dieses Zentralpotential liefert das gängige Modell für die Grobstruktur wasserstoffartiger Atome. Im Gaußschen Maßsystem ist dann

$$v(r) = -\frac{Ze^2}{r} \quad (3.4.1)$$

mit der Kernladung  $Z \in \mathbb{N}$  und der Elementarladung  $e$ . Zum Vergleich mit Meßergebnissen benötigen wir die Werte einiger physikalischer Konstanten:

|                           |                                                                                                  |
|---------------------------|--------------------------------------------------------------------------------------------------|
| Elementarladung $e$       | $e^2 = 23,0711 \dots \cdot 10^{-20} \text{ cm erg}$                                              |
| Masse des Elektrons $m_e$ | $m_e = 9,1095 \dots \cdot 10^{-28} \text{ g}$                                                    |
| Masse des Protons $m_p$   | $m_p = 1836,14 \dots \cdot m_e$                                                                  |
| Energieeinheiten          | $1\text{eV} = 1,602 \dots \cdot 10^{-12} \text{ erg} = 1,602 \dots \cdot 10^{-19} \text{ Joule}$ |

### 3.4.1 Die Eigenfunktionen des Hamilton-Operators

Der im Abschnitt 3.2 ausgeführten Reduktion des Eigenwertproblems zufolge bleibt die Eigenwertgleichung (3.2.13) mit dem Potential (3.4.1)

$$\left\{ -\frac{\hbar^2}{2m_0} \left( \frac{d}{dr} \right)^2 + \frac{\hbar^2}{2m_0} \frac{l(l+1)}{r^2} - \frac{Ze^2}{r} \right\} u(r) = Eu(r)$$

und der Randbedingung  $u(r) \sim r^{l+1}$  für  $r \rightarrow 0$  zu lösen. Zu einer ersten Orientierung betrachten wir diese Gleichung im Bereich großer Werte von  $r$  und vernachlässigen das wirksame Potential. Die Lösungen sind dann wohlbekannt: Für  $E > 0$  sind es oszillierende Exponentialfunktionen, hingegen für  $E < 0$  anwachsende und abfallende Exponentialfunktionen. Quadratintegrale Lösungen können also nur zustandekommen, wenn  $E < 0$  ist und dazuhin asymptotisch keine anwachsende Exponentialfunktion auftritt. Ein solches Verhalten kann lediglich für diskrete negative Werte von  $E$  erwartet werden. Wir wollen jedoch, auch im Hinblick auf die später noch zu erschließende Streuung am Coulomb-Potential, alle Werte  $E \in \mathbb{R}$  im Auge behalten und definieren deshalb den Parameter  $K \in \mathbb{C}$  durch

$$\frac{2m_0 E}{\hbar^2} = K^2, \quad K = \begin{cases} k := \left( \frac{2m_0 E}{\hbar^2} \right)^{\frac{1}{2}}, & \text{falls } E > 0, \\ i\kappa := i \left( \frac{-2m_0 E}{\hbar^2} \right)^{\frac{1}{2}}, & \text{falls } E < 0. \end{cases} \quad (3.4.2)$$

Die Eigenwertgleichung erlangt hiermit, wenn wir noch die Abkürzung

$$r_0 := \frac{\hbar^2}{e^2 m_0} \quad (3.4.3)$$

verwenden, die Gestalt

$$\left\{ - \left( \frac{d}{dr} \right)^2 + \frac{l(l+1)}{r^2} - \frac{2Z}{rr_0} \right\} u(r) = K^2 u(r). \quad (3.4.4)$$

Im Lösungsansatz

$$u(r) = r^{l+1} e^{iKr} h(\rho), \quad \text{wobei } \rho := -2iKr, \quad (3.4.5)$$

ist der erste Faktor das geforderte Schwellenverhalten für kleine Werte von  $r$ , der zweite Faktor ist das Verhalten der gesuchten Lösung bei großen Werten von  $r$ . Der spezielle Faktor von  $r$  im Argument  $\rho$  der neuen noch zu bestimmenden Funktion  $h$  ist so gewählt, daß wir direkt auf die Standardform einer bekannten Differentialgleichung der mathematischen Physik stoßen, und nicht erst über nachträgliche Umdefinitionen. Der Ansatz (3.4.5) konvertiert die Gleichung (3.4.4) in die *konfluente hypergeometrische Differentialgleichung*

$$\left\{ \rho \left( \frac{d}{d\rho} \right)^2 + (2l+2-\rho) \frac{d}{d\rho} - \left( l+1 - \frac{iZ}{Kr_0} \right) \right\} h(\rho) = 0, \quad (3.4.6)$$

wovon man sich nach einer Übung im Differenzieren unschwer überzeugt. Die *konfluente hypergeometrische Funktion*, siehe z.B. [AS],

$${}_1F_1(a; c; \zeta) = 1 + \frac{a}{c} \frac{\zeta}{1!} + \frac{a(a+1)}{c(c+1)} \frac{\zeta^2}{2!} + \frac{a(a+1)(a+2)}{c(c+1)(c+2)} \frac{\zeta^3}{3!} + \dots$$

ist für festes  $a, c \in \mathbb{C}$  eine ganze holomorphe Funktion der (komplexen) Variablen  $\zeta$ ; sie genügt der Differentialgleichung

$$\left\{ \zeta \left( \frac{d}{d\zeta} \right)^2 + (c - \zeta) \frac{d}{d\zeta} - a \right\} {}_1F_1(a; c; \zeta) = 0 .$$

An der Form der Potenzreihe erkennen wir die sogleich verwendete Eigenschaft der konfluenten hypergeometrischen Funktion: Falls  $a = -m$ ,  $m \in \mathbb{N}_0$ , bricht die Reihe ab und  ${}_1F_1(-m; c; \zeta)$  ist ein Polynom  $m$ -ten Grades. Wir benötigen im Ansatz (3.4.5) die im Ursprung reguläre Lösung der Differentialgleichung (3.4.6), also

$$h(\rho) = \text{const } {}_1F_1\left(l+1 - \frac{iZ}{Kr_0}; 2l+2; -2iKr\right) .$$

Zusammengefaßt: Für alle Werte  $E \in \mathbb{R}$  und  $l \in \mathbb{N}_0$  ist

$$u_l(r) = \text{const } r^{l+1} e^{iKr} {}_1F_1\left(l+1 - \frac{iZ}{Kr_0}; 2l+2; -2iKr\right) \quad (3.4.7)$$

die Lösung der Differentialgleichung (3.4.4) mit der Randbedingung (3.2.15). Wir wissen bereits, daß diese Lösung für  $E > 0$  nicht quadratintegrabel ist, jedoch (polynomial) beschränkt. Im Vorgriff auf das Kapitel 6 sei hier schon angedeutet, daß sie die Streuung durch das Coulomb-Potential beschreibt. Für Werte  $E < 0$  ist  $K = i\kappa$ , (3.4.2). Dann wird zwar die Exponentialfunktion in (3.4.7) zu  $\exp(-\kappa r)$ , die Funktion  ${}_1F_1$  indessen wächst im wesentlichen wie  $\exp(2\kappa r)$ , wie aus ihrer später im Abschnitt 6.8 aufgeführten asymptotischen Gestalt entnommen werden kann (oder mit etwas Intuition aus der Potenzreihe). Somit wächst  $u_l(r)$  exponentiell für fast alle  $E < 0$ , ist daher im Rahmen der Quantenmechanik nicht brauchbar. Ausgenommen sind diejenigen Werte  $E < 0$ , bei welchen die Potenzreihe abbricht. Wie wir zuvor gesehen haben, gilt:

$${}_1F_1\left(l+1 - \frac{Z}{\kappa r_0}; 2l+2; 2\kappa r\right)$$

ist genau dann ein Polynom vom Grad  $n_r \in \mathbb{N}_0$ , falls

$$l+1 - \frac{Z}{r_0 \kappa} \stackrel{!}{=} -n_r, \quad \Rightarrow \kappa^2 = \left( \frac{Z}{r_0} \right)^2 (n_r + l + 1)^{-2} . \quad (3.4.8)$$

Mit der *Hauptquantenzahl*  $n := n_r + l + 1$  ergeben sich dann die Eigenwerte des Hamilton-Operators zu

$$E_n = -\frac{m_0(Ze^2)^2}{2\hbar^2} \frac{1}{n^2}, \quad n \in \mathbb{N}. \quad (3.4.9)$$

Es gibt offensichtlich unendlich viele Eigenwerte,  $E = 0$  ist Häufungspunkt. Die Eigenwerte sind hoch entartet: Zu festem  $n$  treten die Drehimpulsquantenzahlen  $l = 0, 1, \dots, n-1$  auf, und somit ist der Entartungsgrad

$$N(n) = \sum_{l=0}^{n-1} (2l+1) = n^2. \quad (3.4.10)$$

Der kleinste Eigenwert ist einfach. Im Falle des Wasserstoffatoms ist  $m_0 = \frac{m_e m_p}{m_e + m_p}$  und führt zu den Energiewerten

$$E_n = -\frac{1}{n^2} \cdot 13,6 \dots \text{eV}.$$

Die Radialfunktion der gebundenen Zustände erhalten wir aus der Lösung (3.4.7), wenn wir dort  $K = i\kappa$  setzen und die Bedingung (3.4.8) verwenden; dabei vermerken wir den zugehörigen Eigenwert durch die entsprechende Hauptquantenzahl:

$$u_{n,l}(r) = c_{n,l} r^{l+1} e^{-\frac{Z}{n} \frac{r}{r_0}} {}_1F_1(l+1-n; 2l+2; \frac{2Z}{n} \frac{r}{r_0}), \quad (3.4.11)$$

wobei  $n \in \mathbb{N}$  und  $l = 0, 1, \dots, n-1$ . Die Konstanten  $c_{n,l}$  werden schließlich noch durch die Normierungsbedingung

$$\int_0^\infty dr |u_{n,l}(r)|^2 \stackrel{!}{=} 1 \quad (3.4.12)$$

(bis auf einen Phasenfaktor) festgelegt. Im Fall des Wasserstoffatoms, also  $Z = 1$ , seien die Radialfunktionen für  $n = 1$  und  $n = 2$  noch explizit angeführt:

$$\begin{aligned} u_{1,0}(r) &= \frac{2}{\sqrt{r_0}} \frac{r}{r_0} e^{-\frac{r}{r_0}}, \\ u_{2,1}(r) &= \frac{1}{\sqrt{24} r_0} \left( \frac{r}{r_0} \right)^2 e^{-\frac{1}{2} \frac{r}{r_0}}, \\ u_{2,0}(r) &= \frac{1}{\sqrt{2} r_0} \frac{r}{r_0} \left( 1 - \frac{1}{2} \frac{r}{r_0} \right) e^{-\frac{1}{2} \frac{r}{r_0}}. \end{aligned} \quad (3.4.13)$$

Fazit: Den Gleichungen (3.2.11) und (3.4.11) zufolge sind die simultanen Eigenfunktionen (Eigenvektoren) der Operatoren  $H$ ,  $\vec{L}^2$ ,  $L_3$  und  $\mathcal{P}$  gegeben in der Gestalt

$$\phi_{n,l,m}(\vec{x}) = \frac{1}{r} u_{n,l}(r) Y_l^m(\vartheta, \varphi), \quad (3.4.14)$$

wobei  $n \in \mathbb{N}$ ,  $l = 0, 1, \dots, n-1$  und  $m = l, \dots, -l$ ; die entsprechenden Eigenwerte sind  $E_n$ , (3.4.9),  $l(l+1)$ ,  $m$  und  $(-1)^l$ . Diese Eigenvektoren sind zwar orthonormal, bilden jedoch keine Basis im Hilbert-Raum, da sie die Möglichkeit der Streuung am Potential nicht enthalten. Physikalisch ausgezeichnet ist der Grundzustand

$$\phi_{1,0,0}(\vec{x}) = (\pi r_0^3)^{-\frac{1}{2}} e^{-\frac{r}{r_0}}.$$

An dieser expliziten Form zeigt sich, daß die zunächst nur als Abkürzung eingeführte Länge  $r_0$ , (3.4.3), offenbar als ein charakteristisches Maß für die räumliche „Ausdehnung“ des betrachteten Systems angesehen werden kann. Die Dichte der Aufenthaltswahrscheinlichkeit verschwindet natürlich nicht außerhalb eines endlichen Bereichs, sondern klingt lediglich exponentiell ab. Wir wollen dies quantitativ verfolgen und berechnen die durch den Grundzustand gegebene Wahrscheinlichkeit, das System (Teilchen) im Raumbereich  $r \leq \nu r_0$  zu finden, wobei  $\nu \in \mathbb{R}_+$ :

$$w(\nu) := \int_{|\vec{x}| \leq \nu r_0} d^3x |\phi_{1,0,0}(\vec{x})|^2 = 1 - e^{-2\nu} (1 + 2\nu + 2\nu^2).$$

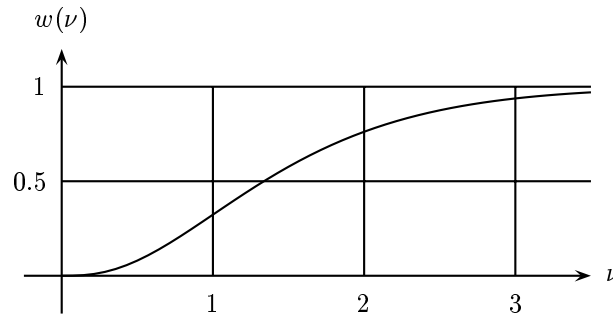

**Abbildung 3.2:** Die Wahrscheinlichkeit dafür, daß sich das Teilchen im Raumbereich  $r \leq \nu r_0$  aufhält, im Fall des Grundzustands

Die Länge  $r_0$  wird auch als *Bohrscher Radius* bezeichnet, ihr numerischer Wert beträgt  $r_0 \approx 5,3 \cdot 10^{-9} \text{ cm}$ . Sieht man  $2r_0$  als den Radius des Systems an, so hat ein Wasserstoffatom einen Durchmesser von  $\approx 2,1 \cdot 10^{-8} \text{ cm}$ .



Nachdem wir die Eigenvektoren des Hamilton-Operators gewonnen haben, drängt sich die Frage nach deren physikalischer Bedeutung auf. Die Zeitentwicklung eines jeden von ihnen durch die Schrödinger-Gleichung besteht lediglich in der Multiplikation mit einem Phasenfaktor  $\exp(-\frac{itE_n}{\hbar})$ , in welchem  $E_n$  der entsprechende Eigenwert ist. Müßten wir deshalb nicht – streng genommen – abzählbar-unendlich viele Wasserstoff-Atomsorten unterscheiden? Im Rahmen des betrachteten Modells – ja! Dieses Modell zeigt jedoch einen wesentlichen physikalischen Mangel: Es enthält geladene Teilchen, jedoch nicht deren Wechselwirkung mit dem (ebenfalls quantisierten) Strahlungsfeld. Diese Wechselwirkung hat zur Folge, daß die Eigenvektoren des atomaren Hamilton-Operators mit einer Quantenzahl  $n > 1$  keine Eigenvektoren des Hamilton-Operators eines aus Atom und Strahlungsfeld gebildeten Gesamtsystems sind: Durch die *spontane Emission* eines oder mehrerer Photonen im Rahmen von Gesetzmäßigkeiten, welche durch die Quantenelektrodynamik theoretisch beschrieben werden, befindet sich das Atom nach endlicher Zeit nicht mehr im anfänglichen Zustand mit  $n > 1$ , sondern im Grundzustand. Die Verweildauer in einem Zustand  $n > 1$  ist im Mittel  $10^{-8}$  sec oder länger – auf Einzelheiten können wir hier nicht eingehen. Es sei nur soviel angedeutet, daß eine solche Zeitdauer im atomaren Bereich als „lang“ angesehen werden muß. Dieser Sachverhalt ist andererseits die Voraussetzung für die gerade benützte Sprechweise. Eine Gesamtheit von Wasserstoffatomen in einem Zustand  $n > 1$  wird im allgemeinen präpariert durch Beschuß einer Gesamtheit solcher Atome im Grundzustand z.B. mit Photonen oder mit Elektronen: Die Atome werden „angeregt“, sie befinden sich jedoch nach einiger Zeit wieder im Grundzustand. Die elektromagnetische Wechselwirkung, die den Gesamtprozeß bewirkt, ist relativ schwach, sodaß von einer Gesamtheit angeregter Atome in einem Zustand  $n > 1$  als einem (intermediären) Ausgangszustand für die spontane Emission gesprochen werden kann.

Zum Schluß werfen wir noch einen Blick auf den Fall eines abstoßenden Coulomb-Potentials: Dieses haben wir vor Augen, wenn wir in den Gleichungen (3.4.1-7) formal  $Z$  durch  $-Z$  ersetzen und  $Z$  dabei ungeändert lassen. Das zuvor Gesagte zur Charakterisierung der Lösungen mit  $E > 0$  gilt weiterhin, wie auch die Aussage für allgemeine Energiewerte  $E < 0$ . Hingegen ist es nicht mehr möglich, diskrete negative Energiewerte zu finden, bei welchen die Potenzreihe abbricht: Hierzu müßte der Parameter

$$a = l + 1 + \frac{Z}{\kappa r_0}$$

in der konfluenten hypergeometrischen Funktion nichtpositiv ganzzahlig sein, was offensichtlich für kein  $\kappa > 0$  erreicht werden kann. Im Fall eines abstoßenden Coulomb-Potentials gibt es keine gebundenen Zustände – nur das Gegenteil würde uns überraschen.

**Aufgabe 3.4.1**

Im Fall der gebundenen Zustände des Wasserstoffatoms mit der Hauptquantenzahl  $n$  und maximalem Wert der Drehimpulsquantenzahl  $l$  bestimme man den Erwartungswert, das mittlere Schwankungsquadrat und das relative mittlere Schwankungsquadrat der Observablen  $r = |\vec{q}|$ ,  $\vec{q}$  ist der Ortsoperator, also  $\langle r \rangle$ ,  $(\Delta r)^2$  und  $(\Delta r)^2 / \langle r \rangle^2$ . (Diese Zustände entsprechen klassischen Kreisbahnen.)

**3.4.2 Die dynamische Symmetrie**

Das diskrete Spektrum des Hamilton-Operators eines geladenen Teilchens im anziehenden Coulomb-Potential weist nicht die natürliche Entartung auf – wiederum muß eine zusätzliche dynamische Symmetrie den höheren Entartungsgrad erzeugen. In der klassischen Mechanik eines Teilchens hat das Potential

$$v(r) = -\frac{k}{r}, \quad k \in \mathbb{R}$$

geometrisch ausgezeichnete Bahnkurven zur Folge; hiermit verknüpft ist die Existenz des zeitlich konstanten *Lenz-Runge-Vektors*

$$\vec{F}_{\text{klass}} = \frac{1}{m_0} [\vec{p}_{\text{klass}} \times \vec{D}_{\text{klass}}] - \frac{k}{r} \vec{x}_{\text{klass}}.$$

Es gibt also einen weiteren erhaltenen Vektor neben dem Drehimpulsvektor  $\vec{D}_{\text{klass}}$ . Mittels des Korrespondenzprinzips wird aus  $\vec{F}_{\text{klass}}$  in der Schrödinger-Darstellung nach einer Symmetrisierung, da die Operatoren  $\vec{p}$  und  $\vec{L}$  nicht vertauschbar sind, der *Lenz-Runge-Operator*

$$\vec{F} = \frac{\hbar^2}{2m_0} (\vec{p} \times \vec{L} - \vec{L} \times \vec{p}) - \frac{k}{r} \vec{x}. \quad (3.4.15)$$

Der entsprechende Hamilton-Operator lautet

$$H = \frac{1}{2m_0} \vec{p}^2 - \frac{k}{r}. \quad (3.4.16)$$

Die Komponenten des Operators  $\vec{F}$  haben die Gestalt

$$F_a = \frac{\hbar^2}{2m_0} \sum_{b,c} \varepsilon_{abc} (p_b L_c - L_b p_c) - \frac{k}{r} x_a , \quad (3.4.17)$$

mit  $a = 1, 2, 3$ , oder, nachdem die explizite Form von  $\vec{L}$  verwendet wurde,

$$F_a = \frac{1}{2m_0} (\vec{p}^2 x_a + x_a \vec{p}^2 - \vec{p} \cdot \vec{x} p_a - p_a \vec{x} \cdot \vec{p}) - \frac{k}{r} x_a .$$

Da  $\vec{L}$  mit dem „Skalarprodukt“ zweier Vektoroperatoren vertauscht, folgen hieraus direkt die Vertauschungsrelationen

$$[L_j, F_a] = i \sum_{b=1}^3 \varepsilon_{jab} F_b , \quad (3.4.18)$$

(der Operator  $\vec{F}$  ist also ein Vektoroperator), sowie die Relationen

$$\vec{L} \cdot \vec{F} = \vec{F} \cdot \vec{L} = 0 . \quad (3.4.19)$$

Mit etwas Aufwand findet man, daß der Lenz-Runge-Operator und der Hamilton-Operator vertauschbar sind:

$$[F_a, H] = 0 , \quad a = 1, 2, 3 . \quad (3.4.20)$$

Ein gegebener Eigenraum des Hamilton-Operators  $H$  wird also nicht nur durch die Operatoren  $L_a, a = 1, 2, 3$ , in sich abgebildet, sondern auch durch die Operatoren  $F_a, a = 1, 2, 3$ . Die Vertauschungsrelationen der Komponenten des Lenz-Runge-Operators untereinander ergeben sich schließlich zu

$$[F_a, F_b] = -i \frac{2\hbar^2}{m_0} H \sum_{c=1}^3 \varepsilon_{abc} L_c . \quad (3.4.21)$$

Hiermit zeigt sich, daß die von den Operatoren  $L_a$  und  $F_a, a = 1, 2, 3$ , erzeugte Kommutatoralgebra auf einem Eigenraum des Hamilton-Operators  $H$  schließt. Aus dieser Algebra läßt sich das diskrete Spektrum des Hamilton-Operators bestimmen! Hierzu benötigt man noch die Relation

$$\vec{F}^2 = \frac{2\hbar^2}{m_0} H (\vec{L}^2 + 1) + k^2 , \quad (3.4.22)$$

welche aus der Form (3.4.17) des Operators  $\vec{F}$  mit einiger Geduld gewonnen wird.

Wir betrachten nun speziell ein anziehendes Coulomb-Potential mit  $k = Ze^2$ , siehe (3.4.1). Außerdem nehmen wir an,  $\mathcal{H}_\alpha \subset \mathcal{H}$  sei ein Eigenraum des Hamilton-Operators  $H$  zum (noch unbekannten) Eigenwert  $E_\alpha < 0$ . Im folgenden wird ausschließlich die Einschränkung aller auftretenden Operatoren auf diesen Unterraum  $\mathcal{H}_\alpha$  benutzt, ohne diese Einschränkung durch eine besondere Bezeichnung anzuzeigen. Die Operatoren  $\vec{L}$  und  $\vec{F}$  genügen dort offenkundig den Vertauschungsrelationen

$$\begin{aligned} [L_a, L_b] &= i \sum_c \varepsilon_{abc} L_c, \\ [L_a, F_b] &= i \sum_c \varepsilon_{abc} F_c, \\ [F_a, F_b] &= i \left( -\frac{2\hbar^2 E_\alpha}{m_0} \right) \sum_c \varepsilon_{abc} L_c. \end{aligned}$$

Anstelle dieser Operatoren führen wir die Linearkombinationen

$$\begin{aligned} A_\alpha &:= \frac{1}{2} \left( L_a + \frac{1}{\hbar} \left( \frac{m_0}{-2E_\alpha} \right)^{\frac{1}{2}} F_a \right), \\ B_\alpha &:= \frac{1}{2} \left( L_a - \frac{1}{\hbar} \left( \frac{m_0}{-2E_\alpha} \right)^{\frac{1}{2}} F_a \right) \end{aligned} \quad (3.4.23)$$

ein, die folglich den Vertauschungsrelationen

$$\begin{aligned} [A_a, A_b] &= i \sum_c \varepsilon_{abc} A_c, \\ [B_a, B_b] &= i \sum_c \varepsilon_{abc} B_c, \\ [A_a, B_b] &= 0 \end{aligned} \quad (3.4.24)$$

genügen. Algebraisch gesehen erzeugen also die Operatoren  $\vec{A}$  und  $\vec{B}$  zwei unabhängige vertauschbare Drehimpuls-Algebren. Dazuhin folgt mit den Relationen (3.4.19), daß

$$4\vec{A}^2 = 4\vec{B}^2 = \vec{L}^2 - \frac{m_0}{2\hbar^2 E_\alpha} \vec{F}^2$$

gilt. Verwendet man zu guter Letzt noch für  $\vec{F}^2$  die Gleichung (3.4.22), so erhält man

$$4\vec{A}^2 = 4\vec{B}^2 = -1 - \frac{m_0 k^2}{2\hbar^2 E_\alpha}. \quad (3.4.25)$$

Wie wir im Abschnitt 2.1 gesehen haben, sind die möglichen Eigenwerte der Operatoren  $\vec{A}^2$  und  $\vec{B}^2$  die Zahlen  $\alpha(\alpha + 1)$  mit den Werten  $\alpha = 0, \frac{1}{2}, 1, \dots$ . Da weder  $\vec{A}$

noch  $\vec{B}$  der Operator des Bahndrehimpulses ist, gibt es keinen Grund, für  $\alpha$  halbzahlige Werte auszuschließen. Wir finden folglich die Gleichung

$$-\frac{m_0^2 k^2}{2\hbar^2 E_\alpha} = 4\alpha(\alpha + 1) + 1 = (2\alpha + 1)^2 \quad (3.4.26)$$

zur Bestimmung der gesuchten Eigenwerte  $E_\alpha$ . Setzt man  $n = 2\alpha + 1$ , also  $n \in \mathbb{N}$ , und  $E_n \equiv E_\alpha$ , ergeben sich die möglichen Eigenwerte des Hamilton-Operators zu

$$E_n = -\frac{m_0(Ze^2)^2}{2\hbar^2} \frac{1}{n^2}.$$

Aufgrund der Ergebnisse des Abschnitts 2.1 wissen wir weiterhin, daß ein Eigenraum des Operators  $\vec{A}^2$  zum Eigenwert  $\alpha(\alpha + 1)$  durch eine Familie aus  $2\alpha + 1$  simultanen Eigenvektoren von  $\vec{A}^2$  und  $A_3$  aufgespannt wird. Deshalb gibt es im Eigenraum  $\mathcal{H}_\alpha$  des Hamilton-Operators  $H$  zum Eigenwert  $E_\alpha$  eine Familie aus  $(2\alpha + 1)^2$  simultanen Eigenvektoren  $\varphi_{\mu,\nu}$  der Operatoren  $\vec{A}^2$ ,  $\vec{B}^2$ ,  $A_3$  und  $B_3$  mit den Eigenwerten  $\alpha(\alpha + 1)$ ,  $\alpha(\alpha + 1)$ ,  $\mu$  und  $\nu$ , wobei  $\mu = \alpha, \dots, -\alpha$  und  $\nu = \alpha, \dots, -\alpha$ . Der Entartungsgrad des Eigenwerts  $E_\alpha$  ist deswegen  $(2\alpha + 1)^2 = n^2$ . Mithin ist gelungen, die Eigenwerte des Hamilton-Operators und deren Entartungsgrad rein algebraisch zu bestimmen. Der Operator des Bahndrehimpulses  $\vec{L}$  ist die Summe zweier vertauschbarer „algebraischer“ Drehimpulsoperatoren:

$$\vec{L} = \vec{A} + \vec{B}.$$

Den Eigenraum  $\mathcal{H}_\alpha$  des Hamilton-Operators nach Eigenräumen von  $\vec{L}^2$  zu zerlegen bedeutet, solche Linearkombinationen der Vektoren  $\varphi_{\mu,\nu}$  zu bilden, die Eigenvektoren des Operators  $\vec{L}^2$  zum Eigenwert  $l(l + 1)$  sind. Wir nennen das Resultat, ohne es hier zu entwickeln („Kopplung eines Drehimpulses der Quantenzahl  $\alpha$  mit einem Drehimpuls derselben Quantenzahl“):  $l$  kann dabei die Werte  $2\alpha, 2\alpha - 1, \dots, 0$  annehmen. Dies sind, wie wir zuvor gesehen haben, die mit einer Hauptquantenzahl  $n = 2\alpha + 1$  verbundenen Drehimpulszahlen  $l$ .
